# Supplementary material for: Trends and Disparities in Pulmonary Embolism Mortality in the United States, 1999– 2023
Source: Research Square preprint supplement (doi:10.21203/rs.3.rs-7049348/v1), 2025-08-18
Supplement: Supplementary file 1 [file 95c0240596ff0660487ef8ea.docx]

**Supplementary Table 1: Deaths per 1,000,000 in the United States, 1999 to 2023**

| Year | Female | Male | NH White | NH Black or African American | Hispanic or Latino |
| --- | --- | --- | --- | --- | --- |
| 1999 | 14083 | 10993 | 7054 | 1509 | 241 |
| 2000 | 14063 | 11387 | 6677 | 1367 | 190 |
| 2001 | 14631 | 11534 | 6830 | 1388 | 236 |
| 2002 | 14937 | 11462 | 6798 | 1386 | 256 |
| 2003 | 14886 | 12155 | 6794 | 1469 | 231 |
| 2004 | 14490 | 11815 | 6323 | 1346 | 253 |
| 2005 | 14860 | 12196 | 6480 | 1358 | 227 |
| 2006 | 15093 | 12420 | 5374 | 1162 | 221 |
| 2007 | 15066 | 12531 | 5553 | 1152 | 231 |
| 2008 | 15574 | 13027 | 5538 | 1209 | 235 |
| 2009 | 15216 | 12929 | 5341 | 1270 | 236 |
| 2010 | 15616 | 13519 | 5609 | 1289 | 234 |
| 2011 | 16066 | 14037 | 5762 | 1302 | 280 |
| 2012 | 16200 | 14253 | 5864 | 1345 | 279 |
| 2013 | 16391 | 14499 | 6042 | 1412 | 260 |
| 2014 | 16657 | 15187 | 6145 | 1501 | 296 |
| 2015 | 17199 | 16039 | 6553 | 1552 | 337 |
| 2016 | 17485 | 16217 | 6370 | 1534 | 363 |
| 2017 | 18354 | 16992 | 6529 | 1563 | 379 |
| 2018 | 18674 | 17555 | 6443 | 1719 | 412 |
| 2019 | 19287 | 18001 | 6338 | 1648 | 383 |
| 2020 | 23494 | 23165 | 6711 | 1931 | 477 |
| 2021 | 27119 | 28547 | 7216 | 1944 | 528 |
| 2022 | 25565 | 24745 | 6988 | 1852 | 513 |
| 2023 | 23803 | 22468 | 6703 | 1798 | 453 |

**Supplementary Table 2: Overall Age-Adjusted Mortality Rates per 1,000,000 in the United States, 1999 to 2023**

| Age Adjusted Rate (95% CI) OVERALL | | | |
| --- | --- | --- | --- |
| Year | *Age Adjusted Rate* | *Age Adjusted Rate Lower 95% Confidence Interval* | *Age Adjusted Rate Upper 95% Confidence Interval* |
| 1999 | 141.6646 | 139.9108 | 143.4183 |
| 2000 | 142.0208 | 140.2758 | 143.7658 |
| 2001 | 143.5371 | 141.7976 | 145.2766 |
| 2002 | 142.5398 | 140.8194 | 144.2602 |
| 2003 | 143.6976 | 141.983 | 145.4121 |
| 2004 | 137.6547 | 135.9884 | 139.321 |
| 2005 | 138.989 | 137.3287 | 140.6493 |
| 2006 | 138.5802 | 136.9371 | 140.2234 |
| 2007 | 136.5792 | 134.9605 | 138.1979 |
| 2008 | 138.6718 | 137.0557 | 140.2878 |
| 2009 | 133.8621 | 132.2865 | 135.4376 |
| 2010 | 136.5469 | 134.9655 | 138.1284 |
| 2011 | 137.831 | 136.2567 | 139.4052 |
| 2012 | 136.1377 | 134.5897 | 137.6856 |
| 2013 | 135.4177 | 133.8865 | 136.9489 |
| 2014 | 136.5879 | 135.0642 | 138.1116 |
| 2015 | 139.3143 | 137.7914 | 140.8371 |
| 2016 | 139.0791 | 137.5667 | 140.5916 |
| 2017 | 142.7657 | 141.2489 | 144.2825 |
| 2018 | 143.4361 | 141.9304 | 144.9418 |
| 2019 | 145.2252 | 143.7213 | 146.729 |
| 2020 | 179.0354 | 177.3759 | 180.6948 |
| 2021 | 215.9562 | 214.1232 | 217.7892 |
| 2022 | 188.221 | 186.544 | 189.898 |
| 2023 | 171.3555 | 169.764 | 172.9469 |

**Supplemental Table 3: Sex‐Stratified** **Age-Adjusted Mortality Rates per 1,000,000 in the United States, 1999 to 2023**

| Age Adjusted Rate (95% CI) Females | | | |
| --- | --- | --- | --- |
| Year | Age Adjusted Rate | Age Adjusted Rate Lower 95% Confidence Interval | Age Adjusted Rate Upper 95% Confidence Interval |
| 1999 | 135.9336 | 133.6751 | 138.1921 |
| 2000 | 134.5719 | 132.3341 | 136.8098 |
| 2001 | 138.1897 | 135.9371 | 140.4424 |
| 2002 | 139.2868 | 137.04 | 141.5335 |
| 2003 | 136.8195 | 134.6071 | 139.0318 |
| 2004 | 131.405 | 129.2508 | 133.5592 |
| 2005 | 132.4453 | 130.2988 | 134.5918 |
| 2006 | 132.3675 | 130.2363 | 134.4988 |
| 2007 | 130.1389 | 128.039 | 132.2387 |
| 2008 | 131.9193 | 129.8232 | 134.0154 |
| 2009 | 127.5665 | 125.5117 | 129.6213 |
| 2010 | 129.0497 | 126.9948 | 131.1045 |
| 2011 | 130.1644 | 128.1142 | 132.2146 |
| 2012 | 129.0066 | 126.9794 | 131.0338 |
| 2013 | 128.3774 | 126.3694 | 130.3854 |
| 2014 | 128.3195 | 126.3251 | 130.314 |
| 2015 | 129.9677 | 127.9772 | 131.9581 |
| 2016 | 130.6331 | 128.6456 | 132.6207 |
| 2017 | 134.4099 | 132.4122 | 136.4076 |
| 2018 | 134.3125 | 132.3316 | 136.2933 |
| 2019 | 136.855 | 134.8668 | 138.8432 |
| 2020 | 164.6932 | 162.5227 | 166.8638 |
| 2021 | 193.8794 | 191.51 | 196.2487 |
| 2022 | 174.9405 | 172.7336 | 177.1473 |
| 2023 | 161.3782 | 159.2756 | 163.4807 |

| Age Adjusted Rate (95% CI) Males | | | |
| --- | --- | --- | --- |
| Year | Age Adjusted Rate | Age Adjusted Rate Lower 95% Confidence Interval | Age Adjusted Rate Upper 95% Confidence Interval |
| 1999 | 149.8033 | 146.9472 | 152.6594 |
| 2000 | 152.5351 | 149.6799 | 155.3904 |
| 2001 | 151.0945 | 148.2864 | 153.9025 |
| 2002 | 146.9663 | 144.2256 | 149.707 |
| 2003 | 152.6113 | 149.8494 | 155.3732 |
| 2004 | 145.4732 | 142.8026 | 148.1438 |
| 2005 | 147.1389 | 144.4819 | 149.7959 |
| 2006 | 145.9187 | 143.309 | 148.5284 |
| 2007 | 144.3426 | 141.7732 | 146.9119 |
| 2008 | 146.3975 | 143.8417 | 148.9534 |
| 2009 | 141.2629 | 138.7849 | 143.7408 |
| 2010 | 145.5372 | 143.0402 | 148.0342 |
| 2011 | 146.5067 | 144.0388 | 148.9745 |
| 2012 | 144.6108 | 142.1925 | 147.0292 |
| 2013 | 143.3724 | 140.9934 | 145.7514 |
| 2014 | 146.5602 | 144.183 | 148.9375 |
| 2015 | 150.4414 | 148.0645 | 152.8184 |
| 2016 | 149.0979 | 146.7532 | 151.4427 |
| 2017 | 152.3848 | 150.044 | 154.7256 |
| 2018 | 154.0236 | 151.6976 | 156.3496 |
| 2019 | 154.9166 | 152.6063 | 157.2268 |
| 2020 | 195.735 | 193.1599 | 198.3101 |
| 2021 | 241.425 | 238.5483 | 244.3017 |
| 2022 | 204.206 | 201.6032 | 206.8088 |
| 2023 | 182.5886 | 180.1457 | 185.0315 |

**Supplementary Table 4: Race‐Stratified** **Age-Adjusted Mortality Rates per 1,000,000 in the United States, 1999 to 2023**

| Age Adjusted Rate (95% CI) BLACK OR AFRICAN AMERICAN | | | |
| --- | --- | --- | --- |
| Year | Age Adjusted Rate | Age Adjusted Rate Lower 95% Confidence Interval | Age Adjusted Rate Upper 95% Confidence Interval |
| 1999 | 94.6208 | 89.7572 | 99.4845 |
| 2000 | 84.2653 | 79.7096 | 88.8209 |
| 2001 | 83.2644 | 78.7893 | 87.7394 |
| 2002 | 82.1945 | 77.7708 | 86.6182 |
| 2003 | 84.8435 | 80.4033 | 89.2836 |
| 2004 | 76.5525 | 72.3601 | 80.7449 |
| 2005 | 75.363 | 71.2506 | 79.4755 |
| 2006 | 62.2484 | 58.5703 | 65.9266 |
| 2007 | 61.389 | 57.7449 | 65.0331 |
| 2008 | 62.537 | 58.9107 | 66.1633 |
| 2009 | 62.9476 | 59.3812 | 66.514 |
| 2010 | 63.0967 | 59.5509 | 66.6426 |
| 2011 | 60.7308 | 57.3339 | 64.1277 |
| 2012 | 61.6631 | 58.2753 | 65.0509 |
| 2013 | 63.8026 | 60.3799 | 67.2252 |
| 2014 | 65.2856 | 61.8917 | 68.6795 |
| 2015 | 65.0865 | 61.76 | 68.4129 |
| 2016 | 63.0583 | 59.8149 | 66.3016 |
| 2017 | 62.7755 | 59.5818 | 65.9692 |
| 2018 | 67.9976 | 64.7018 | 71.2933 |
| 2019 | 62.8334 | 59.7237 | 65.9431 |
| 2020 | 71.9164 | 68.6332 | 75.1996 |
| 2021 | 70.11 | 66.9031 | 66.9031 |
| 2022 | 66.1602 | 63.0721 | 63.0721 |
| 2023 | 62.2836 | 59.3306 | 59.3306 |

| Age Adjusted Rate (95% CI) WHITE | | | |
| --- | --- | --- | --- |
| Year | Age Adjusted Rate | Age Adjusted Rate Lower 95% Confidence Interval | Age Adjusted Rate Upper 95% Confidence Interval |
| 1999 | 48.178 | 47.052 | 49.3041 |
| 2000 | 45.3831 | 44.2926 | 46.4736 |
| 2001 | 45.9096 | 44.8185 | 47.0007 |
| 2002 | 45.2121 | 44.1344 | 46.2899 |
| 2003 | 44.6626 | 43.5964 | 45.7289 |
| 2004 | 41.1762 | 40.1562 | 42.1962 |
| 2005 | 41.6027 | 40.5834 | 42.622 |
| 2006 | 34.1146 | 33.1947 | 35.0345 |
| 2007 | 34.853 | 33.9267 | 35.7794 |
| 2008 | 34.311 | 33.3953 | 35.2266 |
| 2009 | 32.9339 | 32.0355 | 33.8324 |
| 2010 | 34.0284 | 33.1212 | 34.9356 |
| 2011 | 34.3793 | 33.4713 | 35.2873 |
| 2012 | 34.6026 | 33.6946 | 35.5106 |
| 2013 | 35.2231 | 34.3099 | 36.1363 |
| 2014 | 35.3589 | 34.4466 | 36.2712 |
| 2015 | 37.1612 | 36.2309 | 38.0915 |
| 2016 | 35.9734 | 35.0557 | 36.8912 |
| 2017 | 36.4122 | 35.4931 | 37.3312 |
| 2018 | 35.4527 | 34.5499 | 36.3554 |
| 2019 | 34.5984 | 33.7086 | 35.4882 |
| 2020 | 37.008 | 36.0777 | 37.9384 |
| 2021 | 35.0918 | 34.2588 | 35.9248 |
| 2022 | 32.6775 | 31.8888 | 33.4662 |
| 2023 | 31.1862 | 30.4183 | 31.954 |

| Age Adjusted Rate (95% CI) HISPANICS OR LATINO | | | |
| --- | --- | --- | --- |
| Year | Age Adjusted Rate | Age Adjusted Rate Lower 95% Confidence Interval | Age Adjusted Rate Upper 95% Confidence Interval |
| 1999 | 25.543 | 22.0769 | 29.009 |
| 2000 | 18.2841 | 15.4936 | 21.0746 |
| 2001 | 22.2499 | 19.2064 | 25.2934 |
| 2002 | 22.9256 | 19.9036 | 25.9476 |
| 2003 | 19.6763 | 16.9429 | 22.4097 |
| 2004 | 20.4022 | 17.6832 | 23.1211 |
| 2005 | 17.6374 | 15.1861 | 20.0886 |
| 2006 | 15.6303 | 13.4188 | 17.8418 |
| 2007 | 15.2899 | 13.1789 | 17.4009 |
| 2008 | 15.384 | 13.2795 | 17.4885 |
| 2009 | 13.7917 | 11.9182 | 15.6652 |
| 2010 | 13.7384 | 11.859 | 15.6178 |
| 2011 | 15.3321 | 13.4287 | 17.2356 |
| 2012 | 14.366 | 12.5877 | 16.1443 |
| 2013 | 12.2634 | 10.6843 | 13.8424 |
| 2014 | 13.8726 | 12.2125 | 15.5326 |
| 2015 | 14.7431 | 13.0907 | 16.3956 |
| 2016 | 15.3254 | 13.6708 | 16.9801 |
| 2017 | 14.8396 | 13.2733 | 16.4059 |
| 2018 | 15.4056 | 13.8542 | 16.9569 |
| 2019 | 14.0546 | 12.5913 | 15.518 |
| 2020 | 16.2788 | 14.7659 | 17.7918 |
| 2021 | 17.7124 | 16.1337 | 19.2911 |
| 2022 | 16.7794 | 15.2739 | 18.285 |
| 2023 | 14.7072 | 13.2997 | 16.1147 |

**Supplementary Table 5: Region‐Stratified** **Age-Adjusted Mortality Rates per 1,000,000 in the United States, 1999 to 2023**

| Age Adjusted Rate (95% CI) NORTHEAST | | | |
| --- | --- | --- | --- |
| Year | Age Adjusted Rate | Age Adjusted Rate Lower 95% Confidence Interval | Age Adjusted Rate Upper 95% Confidence Interval |
| 1999 | 28.3608 | 26.9777 | 29.7439 |
| 2000 | 27.7804 | 26.4193 | 29.1415 |
| 2001 | 26.0902 | 24.7763 | 27.4042 |
| 2002 | 26.0993 | 24.7938 | 27.4048 |
| 2003 | 26.041 | 24.7437 | 27.3383 |
| 2004 | 22.5722 | 21.3684 | 23.776 |
| 2005 | 23.4788 | 22.2551 | 24.7026 |
| 2006 | 19.3666 | 18.2601 | 20.473 |
| 2007 | 18.2918 | 17.2158 | 19.3678 |
| 2008 | 18.541 | 17.4652 | 19.6168 |
| 2009 | 17.5401 | 16.498 | 18.5822 |
| 2010 | 17.0015 | 15.9775 | 18.0256 |
| 2011 | 18.2402 | 17.1851 | 19.2954 |
| 2012 | 17.733 | 16.6956 | 18.7704 |
| 2013 | 17.6486 | 16.6248 | 18.6724 |
| 2014 | 16.9638 | 15.9628 | 17.9647 |
| 2015 | 18.5525 | 17.5149 | 19.5901 |
| 2016 | 18.2567 | 17.226 | 19.2874 |
| 2017 | 17.8229 | 16.8088 | 18.837 |
| 2018 | 18.3948 | 17.3701 | 19.4194 |
| 2019 | 18.6722 | 17.6487 | 19.6957 |
| 2020 | 19.8243 | 18.7625 | 20.8861 |
| 2021 | 13.0201 | 10.3999 | 16.0996 |
| 2022 | 12.0252 | 9.5497 | 14.9463 |
| 2023 | 11.0389 | 8.6975 | 13.8169 |

| Age Adjusted Rate (95% CI) MIDWEST | | | |
| --- | --- | --- | --- |
| Year | Age Adjusted Rate | Age Adjusted Rate Lower 95% Confidence Interval | Age Adjusted Rate Upper 95% Confidence Interval |
| 1999 | 37.9055 | 36.4074 | 39.4036 |
| 2000 | 34.341 | 32.9203 | 35.7618 |
| 2001 | 34.0934 | 32.6854 | 35.5014 |
| 2002 | 34.3383 | 32.9318 | 35.7448 |
| 2003 | 33.8973 | 32.5076 | 35.2871 |
| 2004 | 31.1143 | 29.7883 | 32.4404 |
| 2005 | 31.2309 | 29.9104 | 32.5514 |
| 2006 | 24.7101 | 23.5428 | 25.8773 |
| 2007 | 26.2088 | 25.0126 | 27.4049 |
| 2008 | 25.1141 | 23.948 | 26.2802 |
| 2009 | 25.0276 | 23.8675 | 26.1877 |
| 2010 | 25.8486 | 24.6727 | 27.0244 |
| 2011 | 25.3945 | 24.2379 | 26.5511 |
| 2012 | 25.7444 | 24.5841 | 26.9048 |
| 2013 | 25.2143 | 24.0711 | 26.3575 |
| 2014 | 25.8871 | 24.7358 | 27.0385 |
| 2015 | 26.9392 | 25.7709 | 28.1075 |
| 2016 | 25.4785 | 24.3373 | 26.6198 |
| 2017 | 26.401 | 25.2471 | 27.5549 |
| 2018 | 25.7655 | 24.6359 | 26.895 |
| 2019 | 27.3186 | 26.1593 | 28.4779 |
| 2020 | 30.0453 | 28.8249 | 31.2657 |
| 2021 | 12.2324 | 8.7782 | 16.5946 |
| 2022 | 15.7881 | 11.6409 | 20.9327 |
| 2023 | 11.6495 | 8.3599 | 15.8039 |

| Age Adjusted Rate (95% CI) SOUTH | | | |
| --- | --- | --- | --- |
| Year | Age Adjusted Rate | Age Adjusted Rate Lower 95% Confidence Interval | Age Adjusted Rate Upper 95% Confidence Interval |
| 1999 | 38.555 | 37.3139 | 39.7962 |
| 2000 | 34.8294 | 33.6587 | 36.0001 |
| 2001 | 35.6632 | 34.4901 | 36.8363 |
| 2002 | 35.7666 | 34.6001 | 36.9332 |
| 2003 | 35.518 | 34.3648 | 36.6712 |
| 2004 | 33.2664 | 32.1599 | 34.373 |
| 2005 | 33.0722 | 31.9794 | 34.1649 |
| 2006 | 27.776 | 26.7853 | 28.7668 |
| 2007 | 27.7004 | 26.7204 | 28.6805 |
| 2008 | 27.9355 | 26.9631 | 28.9078 |
| 2009 | 27.0189 | 26.0699 | 27.9679 |
| 2010 | 27.8975 | 26.9423 | 28.8526 |
| 2011 | 27.9004 | 26.9566 | 28.8442 |
| 2012 | 27.6617 | 26.7312 | 28.5922 |
| 2013 | 28.4726 | 27.5369 | 29.4083 |
| 2014 | 28.8537 | 27.9241 | 29.7834 |
| 2015 | 29.6449 | 28.7113 | 30.5786 |
| 2016 | 28.6434 | 27.7334 | 29.5534 |
| 2017 | 28.7414 | 27.8383 | 29.6446 |
| 2018 | 28.2547 | 27.3701 | 29.1393 |
| 2019 | 25.1549 | 24.3264 | 25.9833 |
| 2020 | 27.2259 | 26.3641 | 28.0878 |
| 2021 | 13.7734 | 11.9933 | 15.5535 |
| 2022 | 11.4234 | 9.867 | 12.9799 |
| 2023 | 10.121 | 8.6419 | 11.6002 |

| Age Adjusted Rate (95% CI) WEST | | | |
| --- | --- | --- | --- |
| Year | Age Adjusted Rate | Age Adjusted Rate Lower 95% Confidence Interval | Age Adjusted Rate Upper 95% Confidence Interval |
| 1999 | 21.9904 | 20.7501 | 23.2307 |
| 2000 | 21.0408 | 19.8393 | 22.2423 |
| 2001 | 22.525 | 21.2965 | 23.7535 |
| 2002 | 19.6752 | 18.5414 | 20.809 |
| 2003 | 19.7302 | 18.6082 | 20.8522 |
| 2004 | 18.4791 | 17.4018 | 19.5564 |
| 2005 | 18.0872 | 17.0377 | 19.1368 |
| 2006 | 14.5977 | 13.6643 | 15.5311 |
| 2007 | 15.0744 | 14.1368 | 16.0121 |
| 2008 | 14.2776 | 13.3762 | 15.179 |
| 2009 | 13.266 | 12.4097 | 14.1222 |
| 2010 | 13.9489 | 13.0751 | 14.8228 |
| 2011 | 13.4626 | 12.6166 | 14.3087 |
| 2012 | 14.1493 | 13.2938 | 15.0049 |
| 2013 | 14.4307 | 13.5776 | 15.2838 |
| 2014 | 14.8344 | 13.974 | 15.6948 |
| 2015 | 15.2942 | 14.4348 | 16.1537 |
| 2016 | 15.2941 | 14.4433 | 16.145 |
| 2017 | 15.0775 | 14.2435 | 15.9115 |
| 2018 | 15.1873 | 14.3544 | 16.0202 |
| 2019 | 14.7849 | 13.9741 | 15.5956 |
| 2020 | 16.4566 | 15.6014 | 17.3117 |
| 2021 | 8.5371 | 7.1005 | 9.9737 |
| 2022 | 9.0688 | 7.597 | 10.5405 |
| 2023 | 7.8766 | 6.5 | 9.2532 |

| Age Adjusted Rate (95% CI) STATES 1999-2020 | | | |
| --- | --- | --- | --- |
| State | Age Adjusted Rate | Age Adjusted Rate Lower 95% Confidence Interval | Age Adjusted Rate Upper 95% Confidence Interval |
| Alabama | 164.9035 | 161.9523 | 167.8548 |
| Alaska | 118.2895 | 109.7879 | 126.791 |
| Arizona | 115.5883 | 113.4458 | 117.7307 |
| Arkansas | 181.7945 | 177.864 | 185.725 |
| California | 118.0381 | 117.1004 | 118.9758 |
| Colorado | 178.8429 | 175.6179 | 182.0678 |
| Connecticut | 123.8629 | 121.0318 | 126.6941 |
| Delaware | 153.0593 | 146.6178 | 159.5007 |
| District of Columbia | 248.9538 | 238.3181 | 259.5894 |
| Florida | 107.7942 | 106.6915 | 108.8969 |
| Georgia | 142.1921 | 140.0783 | 144.3059 |
| Hawaii | 73.0012 | 69.443 | 76.5594 |
| Idaho | 155.0854 | 149.8909 | 160.2798 |
| Illinois | 147.0801 | 145.3575 | 148.8027 |
| Indiana | 164.7035 | 162.1509 | 167.2561 |
| Iowa | 151.4639 | 148.0836 | 154.8441 |
| Kansas | 150.9349 | 147.295 | 154.5749 |
| Kentucky | 168.6166 | 165.4676 | 171.7655 |
| Louisiana | 154.089 | 151.0771 | 157.1008 |
| Maine | 112.951 | 108.6464 | 117.2557 |
| Maryland | 174.3322 | 171.5149 | 177.1496 |
| Massachusetts | 119.7724 | 117.7057 | 121.839 |
| Michigan | 147.8064 | 145.8996 | 149.7131 |
| Minnesota | 136.7746 | 134.2349 | 139.3144 |
| Mississippi | 190.3144 | 186.1864 | 194.4424 |
| Missouri | 154.1298 | 151.6231 | 156.6364 |
| Montana | 135.7104 | 130.083 | 141.3378 |
| Nebraska | 171.604 | 166.8127 | 176.3953 |
| Nevada | 123.7499 | 120.1013 | 127.3985 |
| New Hampshire | 127.6282 | 122.8125 | 132.4438 |
| New Jersey | 123.1973 | 121.356 | 125.0385 |
| New Mexico | 127.3213 | 123.2764 | 131.3661 |
| New York | 114.4784 | 113.2788 | 115.6779 |
| North Carolina | 161.3268 | 159.2207 | 163.4329 |
| North Dakota | 145.4859 | 138.3955 | 152.5763 |
| Ohio | 157.3283 | 155.5203 | 159.1364 |
| Oklahoma | 147.0566 | 143.889 | 150.2243 |
| Oregon | 125.4948 | 122.7017 | 128.288 |
| Pennsylvania | 144.9214 | 143.3295 | 146.5132 |
| Rhode Island | 131.5949 | 126.2906 | 136.8992 |
| South Carolina | 188.0585 | 184.8336 | 191.2835 |
| South Dakota | 159.43 | 152.6563 | 166.2038 |
| Tennessee | 181.7659 | 179.0589 | 184.473 |
| Texas | 164.5022 | 163.0769 | 165.9275 |
| Utah | 165.6849 | 161.0578 | 170.312 |
| Vermont | 157.4076 | 149.7832 | 165.032 |
| Virginia | 138.7401 | 136.5786 | 140.9015 |
| Washington | 149.9476 | 147.531 | 152.3642 |
| West Virginia | 161.1623 | 156.7438 | 165.5809 |
| Wisconsin | 153.0171 | 150.4724 | 155.5617 |
| Wyoming | 195.5615 | 185.9226 | 205.2004 |

| Age Adjusted Rate (95% CI) STATES 2018-2023 | | | |
| --- | --- | --- | --- |
| State | Age Adjusted Rate | Age Adjusted Rate Lower 95% Confidence Interval | Age Adjusted Rate Upper 95% Confidence Interval |
| Alabama | 196.4125 | 188.2961 | 204.5288 |
| Alaska | 167.5119 | 144.9663 | 190.0576 |
| Arizona | 167.9324 | 161.8192 | 174.0455 |
| Arkansas | 240.7869 | 229.1268 | 252.4471 |
| California | 148.6636 | 146.0848 | 151.2424 |
| Colorado | 310.8887 | 300.9803 | 320.7971 |
| Connecticut | 150.8142 | 142.7613 | 158.867 |
| Delaware | 215.891 | 197.3484 | 234.4335 |
| District of Columbia | 319.2429 | 288.5322 | 349.9537 |
| Florida | 158.0902 | 154.8514 | 161.329 |
| Georgia | 198.067 | 192.2275 | 203.9064 |
| Hawaii | 100.388 | 90.1338 | 110.6422 |
| Idaho | 242.0717 | 227.0998 | 257.0436 |
| Illinois | 160.7966 | 156.1856 | 165.4077 |
| Indiana | 233.1851 | 225.5047 | 240.8655 |
| Iowa | 201.8334 | 191.5539 | 212.1129 |
| Kansas | 202.1512 | 191.184 | 213.1183 |
| Kentucky | 258.1233 | 248.2541 | 267.9926 |
| Louisiana | 169.7251 | 161.5822 | 177.868 |
| Maine | 74.914 | 65.686 | 84.1421 |
| Maryland | 275.3886 | 266.7712 | 284.006 |
| Massachusetts | 161.3957 | 155.3543 | 167.437 |
| Michigan | 206.26 | 200.4798 | 212.0401 |
| Minnesota | 243.995 | 235.6273 | 252.3628 |
| Mississippi | 269.578 | 256.9324 | 282.2235 |
| Missouri | 207.1717 | 199.7036 | 214.6397 |
| Montana | 217.7591 | 200.0677 | 235.4505 |
| Nebraska | 241.5793 | 227.0382 | 256.1205 |
| Nevada | 177.2605 | 167.3622 | 187.1587 |
| New Hampshire | 188.7113 | 174.2457 | 203.1769 |
| New Jersey | 144.5821 | 139.5616 | 149.6025 |
| New Mexico | 149.805 | 138.8884 | 160.7216 |
| New York | 153.3667 | 149.8454 | 156.888 |
| North Carolina | 206.9814 | 201.2374 | 212.7254 |
| North Dakota | 179.3948 | 159.2627 | 199.5268 |
| Ohio | 211.7562 | 206.3042 | 217.2082 |
| Oklahoma | 208.5735 | 198.9678 | 218.1791 |
| Oregon | 219.574 | 210.505 | 228.6429 |
| Pennsylvania | 207.7002 | 202.7271 | 212.6732 |
| Rhode Island | 174.0741 | 158.4539 | 189.6943 |
| South Carolina | 259.5768 | 250.5548 | 268.5987 |
| South Dakota | 239.4214 | 218.1887 | 260.6541 |
| Tennessee | 232.2865 | 224.7629 | 239.8102 |
| Texas | 205.4514 | 201.7287 | 209.1741 |
| Utah | 224.8647 | 212.4119 | 237.3174 |
| Vermont | 211.1642 | 189.0567 | 233.2716 |
| Virginia | 171.2801 | 165.4957 | 177.0646 |
| Washington | 220.1767 | 213.193 | 227.1605 |
| West Virginia | 228.3146 | 214.1537 | 242.4755 |
| Wisconsin | 220.4313 | 212.6471 | 228.2154 |
| Wyoming | 292.3983 | 263.6397 | 321.1568 |

**Supplementary Table 6: Age group‐Stratified** **Age-Adjusted Mortality Rates per 1,000,000 in the United States, 1999 to 2023**

| Age Adjusted Rate (95% CI) OLDER ADULTS | | | |
| --- | --- | --- | --- |
| Year | Age Adjusted Rate | Age Adjusted Rate Lower 95% Confidence Interval | Age Adjusted Rate Upper 95% Confidence Interval |
| 1999 | 357.6422 | 352.7896 | 362.4949 |
| 2000 | 352.0801 | 347.2931 | 356.8671 |
| 2001 | 358.5576 | 353.7647 | 363.3504 |
| 2002 | 355.3193 | 350.59 | 360.0487 |
| 2003 | 354.6292 | 349.9443 | 359.3141 |
| 2004 | 340.4563 | 335.9004 | 345.0122 |
| 2005 | 346.3888 | 341.837 | 350.9405 |
| 2006 | 342.1722 | 337.6925 | 346.6519 |
| 2007 | 336.832 | 332.4291 | 341.235 |
| 2008 | 342.9403 | 338.5463 | 347.3344 |
| 2009 | 324.3082 | 320.0795 | 328.5369 |
| 2010 | 332.5648 | 328.3144 | 336.8152 |
| 2011 | 333.7856 | 329.5855 | 337.9857 |
| 2012 | 329.4094 | 325.2964 | 333.5224 |
| 2013 | 325.9808 | 321.9372 | 330.0244 |
| 2014 | 326.7382 | 322.7457 | 330.7306 |
| 2015 | 334.6668 | 330.6759 | 338.6578 |
| 2016 | 328.7478 | 324.8398 | 332.6559 |
| 2017 | 338.4638 | 334.5508 | 342.3769 |
| 2018 | 338.9329 | 335.0768 | 342.7891 |
| 2019 | 340.7375 | 336.919 | 344.5561 |
| 2020 | 417.0347 | 412.857 | 421.2123 |
| 2021 | 503.5934 | 498.9492 | 508.2375 |
| 2022 | 452.1402 | 447.837 | 456.4433 |
| 2023 | 414.8671 | 410.7601 | 418.974 |

| Age Adjusted Rate (95% CI) YOUNGER ADULTS | | | |
| --- | --- | --- | --- |
| Year | Age Adjusted Rate | Age Adjusted Rate Lower 95% Confidence Interval | Age Adjusted Rate Upper 95% Confidence Interval |
| 1999 | 35.1112 | 34.0495 | 36.1729 |
| 2000 | 38.3872 | 37.2858 | 39.4887 |
| 2001 | 37.4559 | 36.3804 | 38.5315 |
| 2002 | 37.5642 | 36.4888 | 38.6396 |
| 2003 | 39.6337 | 38.5321 | 40.7353 |
| 2004 | 37.6018 | 36.5341 | 38.6695 |
| 2005 | 36.6676 | 35.6166 | 37.7185 |
| 2006 | 38.1374 | 37.0712 | 39.2035 |
| 2007 | 37.7837 | 36.7233 | 38.8441 |
| 2008 | 37.8951 | 36.8345 | 38.9557 |
| 2009 | 39.9048 | 38.8168 | 40.9927 |
| 2010 | 39.8408 | 38.7545 | 40.9271 |
| 2011 | 41.156 | 40.0456 | 42.2664 |
| 2012 | 40.7864 | 39.679 | 41.8937 |
| 2013 | 41.4027 | 40.2852 | 42.5202 |
| 2014 | 42.7765 | 41.6374 | 43.9157 |
| 2015 | 42.9364 | 41.7982 | 44.0745 |
| 2016 | 45.5054 | 44.3289 | 46.6818 |
| 2017 | 46.2173 | 45.0324 | 47.4021 |
| 2018 | 46.987 | 45.7884 | 48.1855 |
| 2019 | 48.7684 | 47.546 | 49.9909 |
| 2020 | 61.6176 | 60.2416 | 62.9935 |
| 2021 | 74.0494 | 72.5517 | 75.5471 |
| 2022 | 58.0156 | 56.6871 | 59.344 |
| 2023 | 51.2181 | 49.9761 | 52.4602 |

**Supplementary Table 7: Age group‐Stratified** **Crude Rates per 1,000,000 in the United States, 1999 to 2023**

| Crude Rates (95% CI) OLDER ADULTS | | | |
| --- | --- | --- | --- |
| Year | Crude Rate | Crude Adjusted Rate Lower 95% Confidence Interval | Crude Adjusted Rate Upper 95% Confidence Interval |
| 1999 | 356.3071 | 351.4731 | 361.1412 |
| 2000 | 350.6538 | 345.8863 | 355.4213 |
| 2001 | 356.036 | 351.2771 | 360.7948 |
| 2002 | 348.8278 | 344.1872 | 353.4685 |
| 2003 | 345.3131 | 340.7558 | 349.8703 |
| 2004 | 328.5369 | 324.1476 | 332.9262 |
| 2005 | 332.1826 | 327.8279 | 336.5374 |
| 2006 | 326.5396 | 322.2787 | 330.8005 |
| 2007 | 319.5444 | 315.385 | 323.7038 |
| 2008 | 324.0982 | 319.9665 | 328.2299 |
| 2009 | 305.2429 | 301.2895 | 309.1962 |
| 2010 | 311.2153 | 307.2685 | 315.1622 |
| 2011 | 311.3159 | 307.4362 | 315.1955 |
| 2012 | 307.8003 | 303.9967 | 311.6039 |
| 2013 | 303.9377 | 300.2099 | 307.6655 |
| 2014 | 305.2104 | 301.5248 | 308.8959 |
| 2015 | 312.437 | 308.7572 | 316.1168 |
| 2016 | 307.2849 | 303.6775 | 310.8924 |
| 2017 | 316.9157 | 313.2947 | 320.5367 |
| 2018 | 319.5225 | 315.9223 | 323.1226 |
| 2019 | 322.454 | 318.8713 | 326.0367 |
| 2020 | 396.6122 | 392.6705 | 400.5539 |
| 2021 | 468.5507 | 464.2791 | 472.8222 |
| 2022 | 429.9847 | 425.918 | 434.0514 |
| 2023 | 392.7687 | 388.9055 | 396.6318 |

| Crude Rates (95% CI) YOUNGER ADULTS | | | |
| --- | --- | --- | --- |
| Year | Crude Rate | Crude Adjusted Rate Lower 95% Confidence Interval | Crude Adjusted Rate Upper 95% Confidence Interval |
| 1999 | 27.4751 | 26.6642 | 28.286 |
| 2000 | 30.0367 | 29.1925 | 30.8809 |
| 2001 | 29.7155 | 28.8815 | 30.5495 |
| 2002 | 29.6961 | 28.8642 | 30.528 |
| 2003 | 31.4057 | 30.5522 | 32.2592 |
| 2004 | 29.8899 | 29.0598 | 30.72 |
| 2005 | 29.2833 | 28.4643 | 30.1024 |
| 2006 | 30.5921 | 29.7576 | 31.4266 |
| 2007 | 30.1895 | 29.3625 | 31.0164 |
| 2008 | 30.4314 | 29.6027 | 31.26 |
| 2009 | 32.0412 | 31.1919 | 32.8905 |
| 2010 | 32.026 | 31.1772 | 32.8748 |
| 2011 | 32.6909 | 31.8337 | 33.548 |
| 2012 | 32.1975 | 31.3471 | 33.0478 |
| 2013 | 32.4934 | 31.6391 | 33.3478 |
| 2014 | 33.3764 | 32.5117 | 34.2412 |
| 2015 | 33.6044 | 32.7374 | 34.4713 |
| 2016 | 35.4108 | 34.52 | 36.3015 |
| 2017 | 35.7186 | 34.825 | 36.6122 |
| 2018 | 36.1818 | 35.2817 | 37.0818 |
| 2019 | 37.4791 | 36.562 | 38.3963 |
| 2020 | 47.2571 | 46.2271 | 48.2871 |
| 2021 | 72.8697 | 71.4 | 74.3395 |
| 2022 | 56.8009 | 55.5034 | 58.0983 |
| 2023 | 50.304 | 49.0868 | 51.5212 |

**Supplementary Table 8: Annual percent change (APC) of mortality rates per 1,000,000 in the United States, 1999 to 2023**

| Year Interval | APC (95% CI) |
| --- | --- |
| **Overall** | |
| 1999-2018 | 0.1768 (-0.3486 to -0.0048) |
| 2018-2021 | 15.3917 (9.8245 to 21.2410) |
| 2021-2023 | -9.7509 (-13.7901 to -5.5225) |
| **Male** | |
| 1999-2020 | -0.881 (-1.065 to –0.695) |
| **Female** | |
| 1999-2020 | 0.374 (0.24 to 0.50) |
| **NH White** | |
| 1999-2003 | -1.4321 (-4.6678 to 1.9133) |
| 2003-2007 | -6.4210 (-11.6714 to -0.8586) |
| 2007-2023 | 0.3548 (-0.0931 to 0.8047) |
| **NH Black or African American** | |
| 1999-2008 | -4.6462 (-6.0212 to -3.2510) |
| 2008-2023 | 0.7817 (0.1552 to 1.4121) |
| **Hispanic or Latino** | |
| 1999-2009 | -5.4351 (-7.3274 to -3.5041) |
| 2009-2020 | 0.6145 (-1.0753 to 2.3332) |
| 2020-2023 | -14.8255 (-21.8245 to -7.1998) |
| **Older Adults** | |
| 1999-2018 | -0.5071 (-0.6745 to -0.3395) |
| 2018-2021 | 14.8418 (9.4966 to 20.4480) |
| 2021-2023 | -7.8161 (-11.7441 to -3.7134) |
| **Younger Adults** | |
| 1999-2018 | 1.1865 (0.8891 to 1.4847) |
| 2018-2021 | 17.1958 (7.5877 to 27.6620) |
| 2021-2023 | -16.4995 (-23.3028 to -9.0928) |
| **Female** | |
| 1999-2016 | 0.0862 (-0.3824 to 0.5569) |
| 2016-2019 | -53.5151 (-58.9392 to -47.3744) |
| 2019-2023 | 8.4286 (4.7487 to 12.2378) |
| **Male** | |
| 1999-2019 | 0.4866 (-2.1545 to 3.1989) |
| 2019-2023 | -46.2604 (-57.5807 to -31.9192) |
| **Northeast** | |
| 1999-2019 | -2.3890 (-4.3628 to -0.3745) |
| 2019-2023 | 97.1669 (52.7379 to 154.5165) |
| **Midwest** | |
| 1999-2019 | -1.6515 (-3.7185 to 0.4599) |
| 2019-2023 | 96.4269 (51.6048 to 154.5008) |
| **South** | |
| 1999-2019 | -1.5170 (-3.7251 to 0.7417) |
| 2019-2023 | 90.9536 (45.4187 to 150.7470) |
| **West** | |
| 1999-2019 | -1.9392 (-4.1769 to 0.3506) |
| 2019-2023 | 97.9808 (52.1903 to 157.5486) |


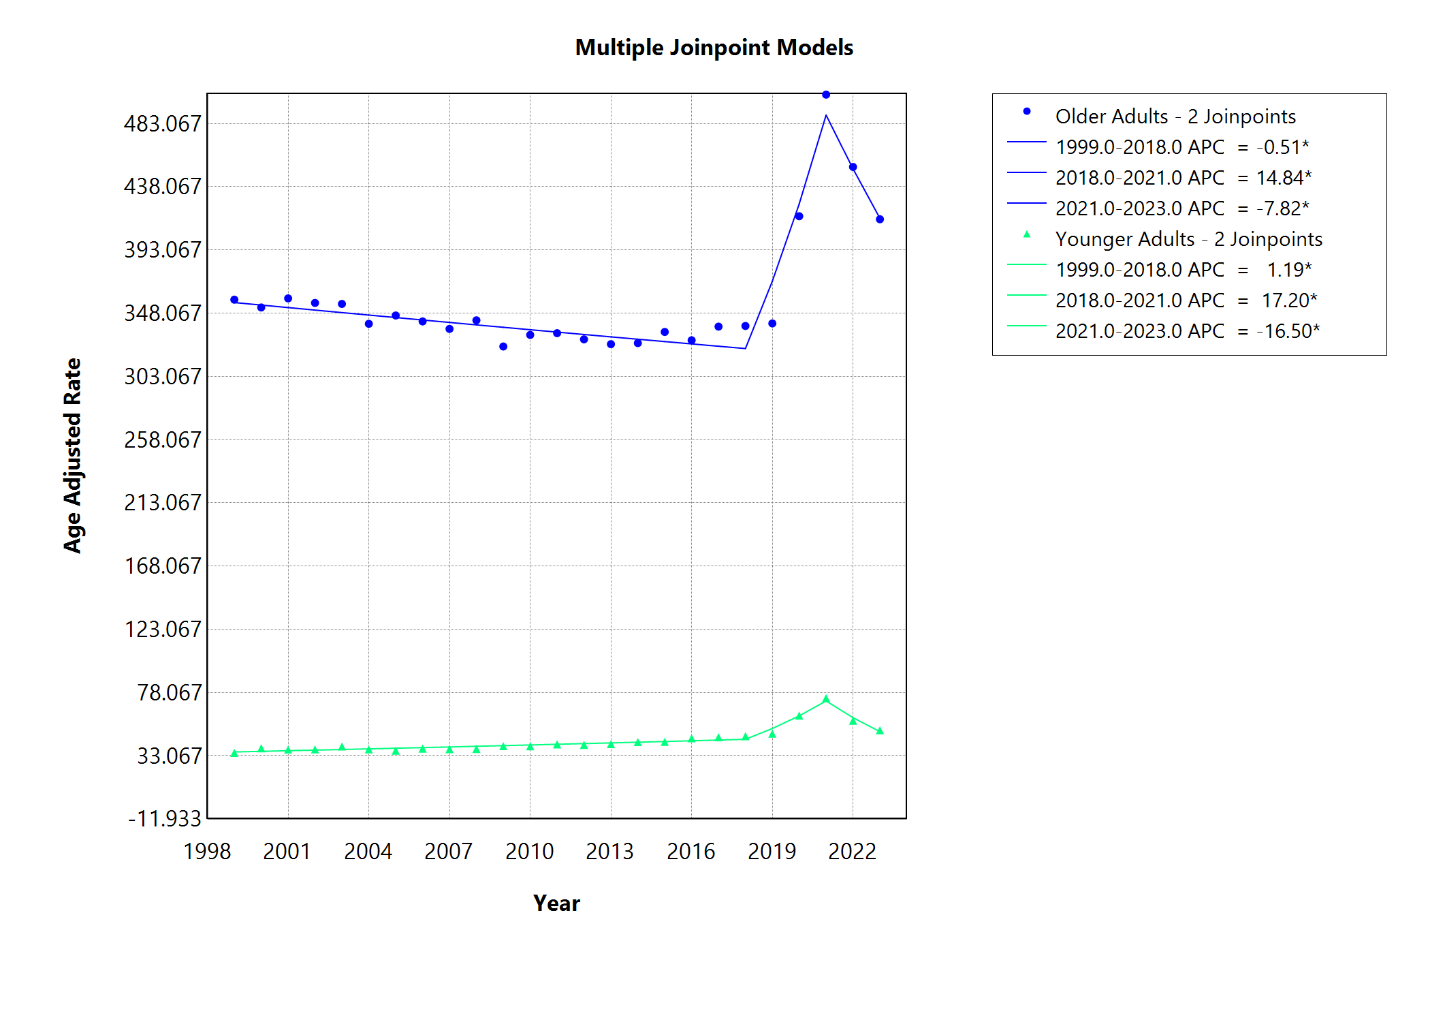


Figure : Age Groups


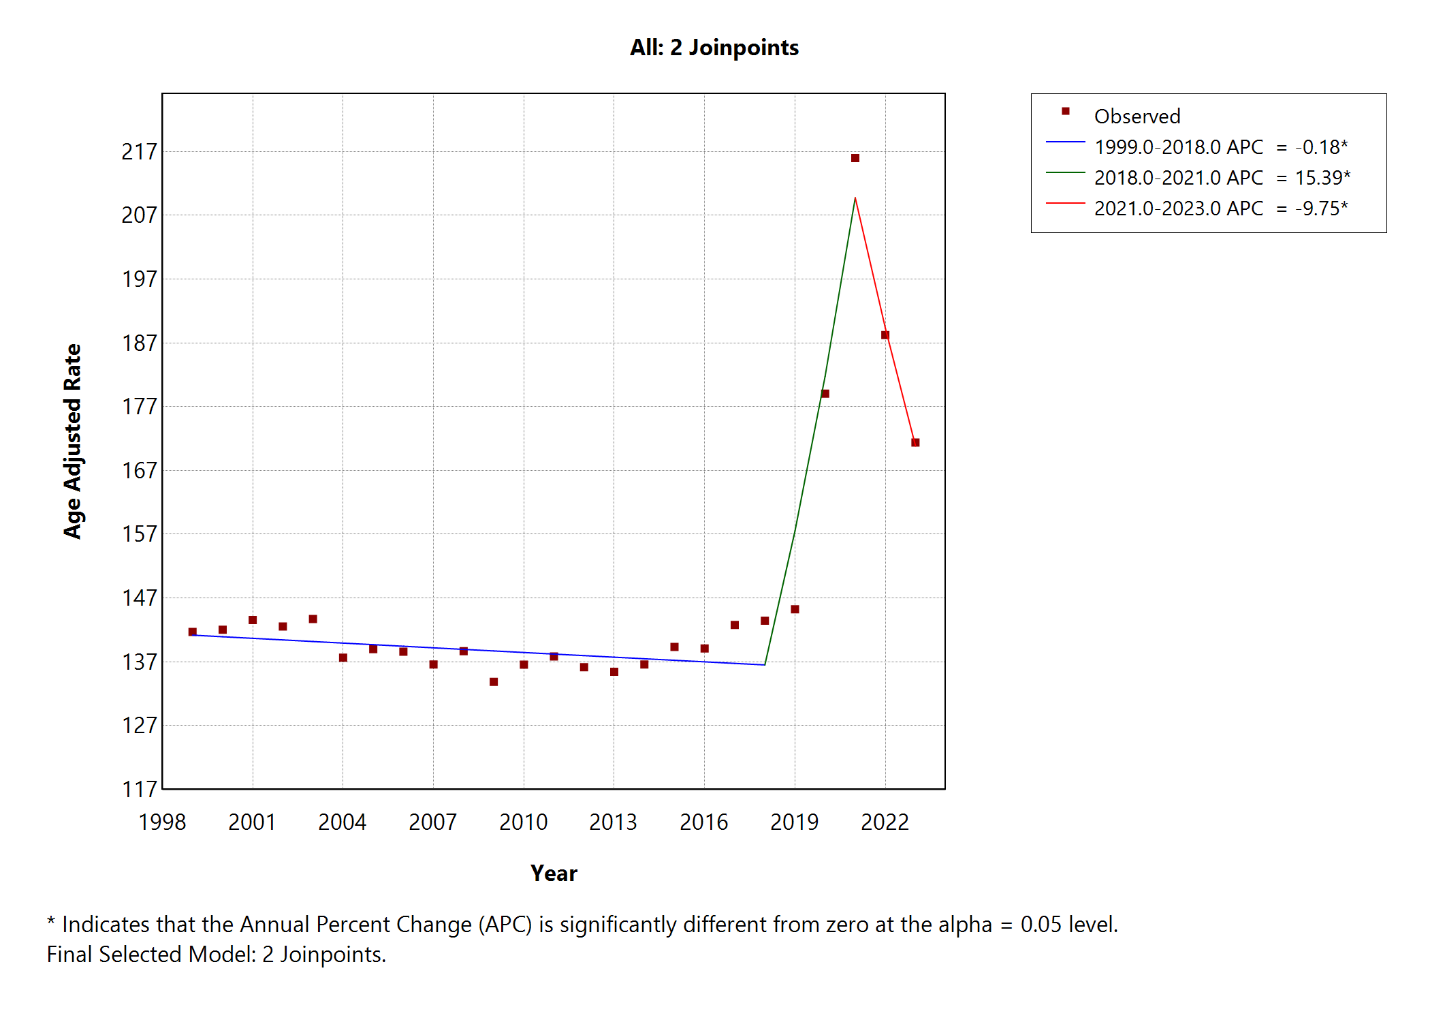


Figure : Overall


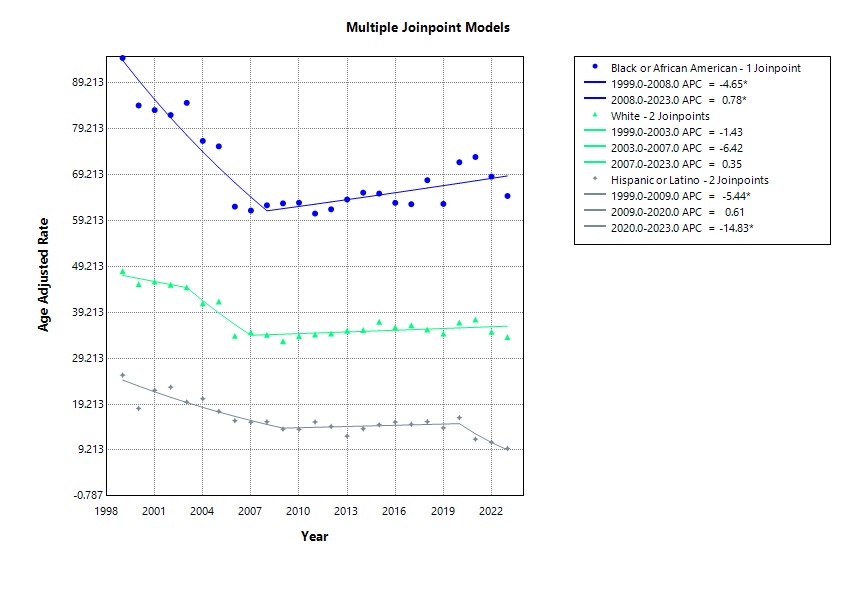


Figure : Race


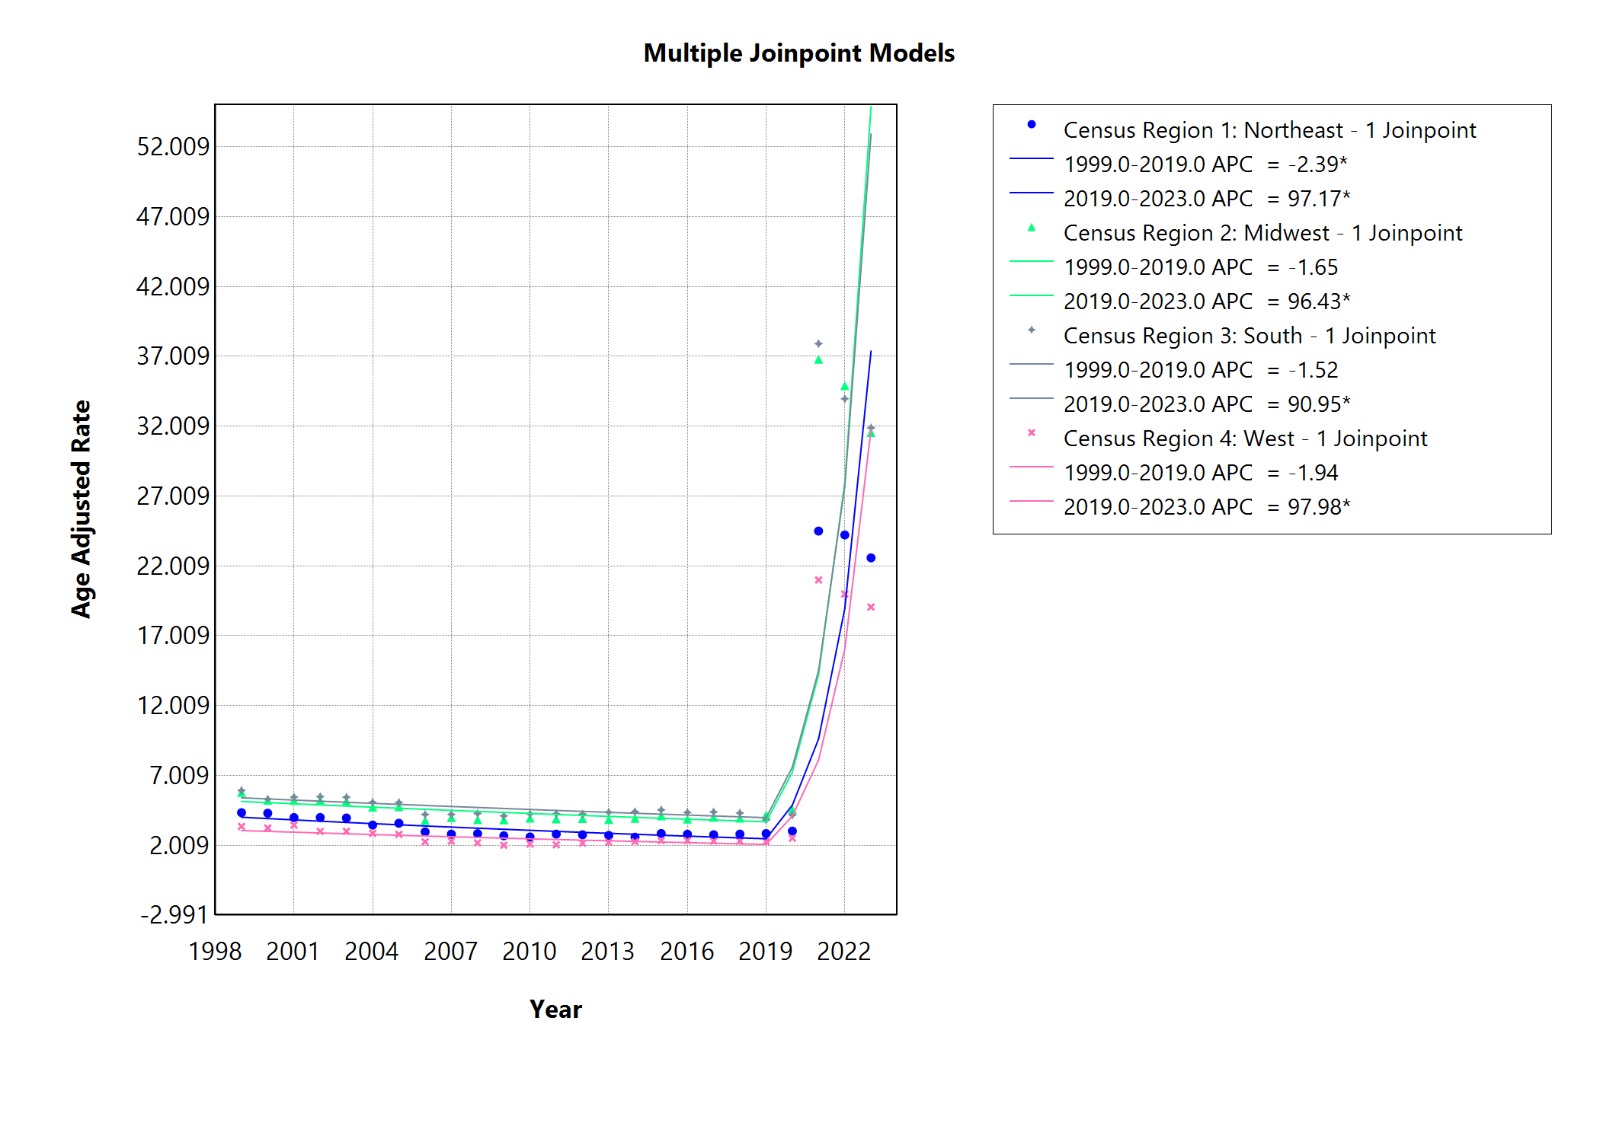


Figure : Region


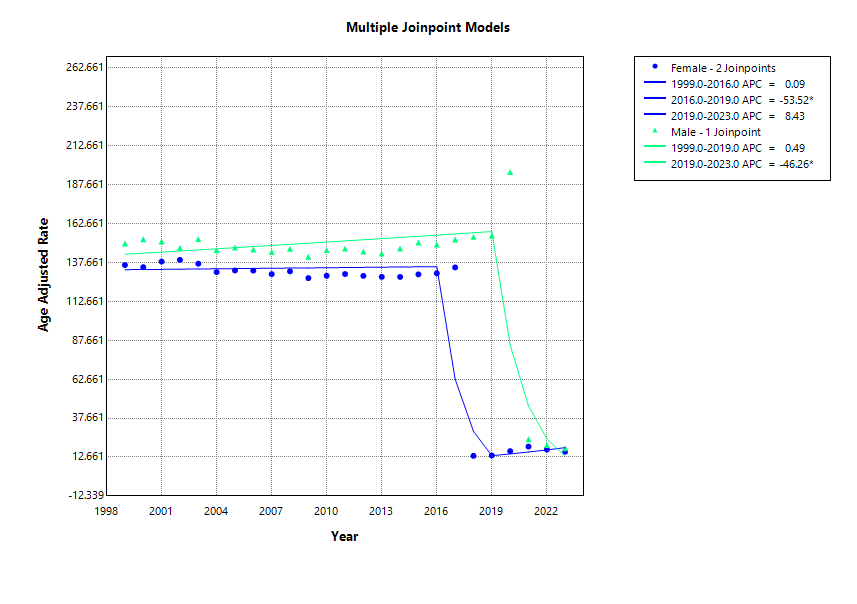


Figure : Sex


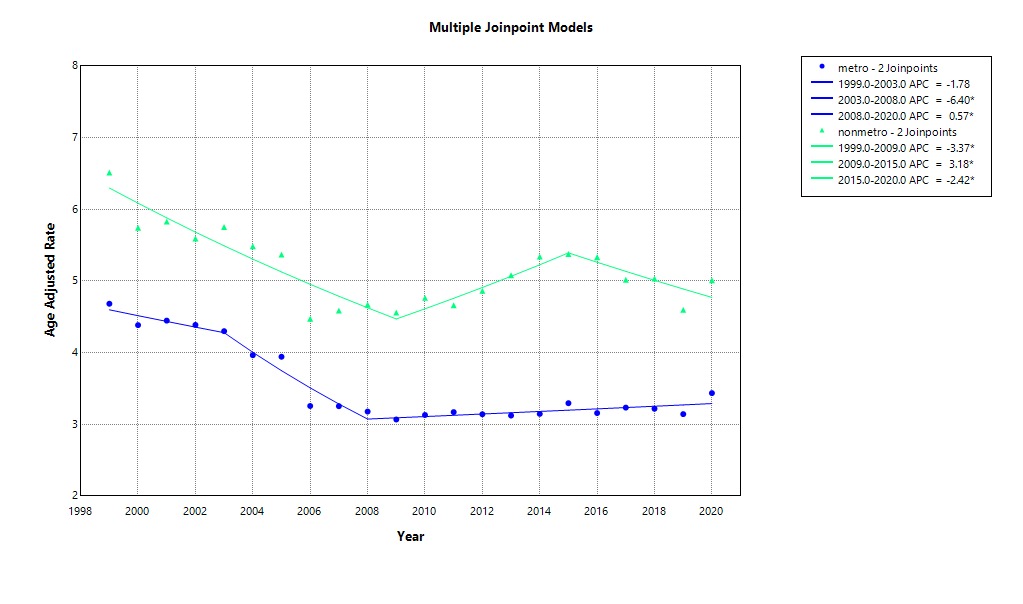


Figure : Urbanization
